# Supplementary material for: Case-Control Pilot Study on Acute Diarrheal Disease in a Geographically Defined Pediatric Population in a Middle Income Country
Source: Hindawi journal article supplement (doi:10.1155/2017/6357597), 2017-01-01
Supplement: f1 [file 6357597.f1.pdf]

## Supplementary Material

**STable 1.** Primer and probes for the conventional multiplex PCR and real-time RT-PCR

| Organisms            | Primers   | Target                            | Primer Sequences (5'-3')          | Amplicons (bp) | References |
|----------------------|-----------|-----------------------------------|-----------------------------------|----------------|------------|
| DAEC                 | daaE-F    | <i>daaE</i>                       | GAA CGT TGG TTA ATG TGG GGT AA    | 542            | 38         |
|                      | daaE-R    |                                   | TAT TCA CCG GTC GGT TAT CAG T     |                |            |
| EAEC                 | aaiC-F    | <i>aaiC</i>                       | ATT GTC CTC AGG CAT TTC AC        | 215            | 39         |
|                      | aaiC-R    |                                   | ACG ACA CCC CTG ATA AAC AA        |                |            |
|                      | aggR-F    | <i>aggR</i>                       | GTA TAC ACA AAA GAA GGA AGC       | 254            | 40         |
|                      | aggR-R    |                                   | ACA GAA TCG TCA GCA TCA GC        |                |            |
| EIEC                 | ipaH-F    | <i>ipaH</i>                       | CTC GGC ACG TTT TAA TAG TCT GG    | 933            | 38         |
|                      | ipaH-R    |                                   | GTG GAG AGC TGA AGT TTC TCT GC    |                |            |
| EPEC                 | Bfp-F     | <i>bfpA</i>                       | AAT GGT GCT TGC GCT TGC TGC       | 326            | 40         |
|                      | Bfp-R     |                                   | GCC GCT TTA TCC AAC CTG GTA       |                |            |
|                      | eae384-F  | <i>eae</i>                        | GAC CCG GCA CAA GCA TAA GC        | 384            | 39         |
|                      | eae384-R  |                                   | CCA CCT GCA GCA ACA AGA GG        |                |            |
|                      | eae917-F  | <i>eae</i>                        | CTG AAC GGC GAT TAC GCG AA        | 917            | 40         |
|                      | eae917-R  |                                   | CGA GAC GAT ACG ATC CAG           |                |            |
| ETEC                 | LT-F      | <i>Elt</i>                        | CAC ACG GAG CTC CTC AGT C         | 508            | 39         |
|                      | LT-R      |                                   | CCC CCA GCC TAG CTT AGT TT        |                |            |
|                      | ST-F      | <i>est</i>                        | GCT AAA CCA GTA G/AGG TCT TCA AAA | 147            | 39         |
|                      | ST-R      |                                   | CCC GGT ACA G/AGC AGG ATT ACA ACA |                |            |
|                      | LngA1-F   | <i>lngA</i>                       | ATGAGCCTGCTGGAAGTTATCATT          | 621            | This study |
|                      | LngA621-R |                                   | TTAACGGCTACCTAAAGTAATTGA          |                |            |
| STEC                 | eae917-F  | <i>eae</i>                        | CTG AAC GGC GAT TAC GCG AA        | 917            | 40         |
|                      | eae917-R  |                                   | CGA GAC GAT ACG ATC CAG           |                |            |
|                      | eae384-F  | <i>eae</i>                        | GAC CCG GCA CAA GCA TAA GC        | 384            | 39         |
|                      | eae384-R  |                                   | CCA CCT GCA GCA ACA AGA GG        |                |            |
|                      | stx1-F    | <i>stx1</i>                       | ATA AAT CGC CAT TCG TTG ACT AC    | 180            | 39         |
|                      | stx1-R    |                                   | AGA ACG CCC ACT GAG ATC ATC       |                |            |
|                      | stx2-F    | <i>stx2</i>                       | GGC ACT GTC TGA AAC TGC TCC       | 255            | 39         |
|                      | stx2-R    |                                   | TCG CCA GTT ATC TGA CAT TCT G     |                |            |
| <i>E. coli</i>       | uidA-F    | <i>uidA</i>                       | GCGTCTGTTGACTGGCAGGTGGTGG         | 503            | 18         |
|                      | uidA-R    |                                   | GTTGCCCGCTTCGAAACCAATGCCT         |                |            |
| <i>Campylobacter</i> | cadF-F    | <i>cadF</i>                       | CTGCTAAACCATAGAAATAAAATTTCTCAC    |                | 16         |
|                      | cadF-R    |                                   | CTTTGAAGGTAATTTAGATATGGATAATCG    |                |            |
| Norovirus GI         | Cog 1F    | ORF1–<br>ORF2<br>junction<br>(GI) | CGYTGGATGCGNTTYCATGA              |                | 41         |
|                      | Cog 1R    |                                   | CTTAGACGCCATCATCATTYAC            |                |            |

| Norovirus<br>GII | Cog 2F         | ORF1–<br>ORF2<br>junction<br>(GII) | CARGARBCNATGTTYAGRTGGATGAG                               | 41         |
|------------------|----------------|------------------------------------|----------------------------------------------------------|------------|
|                  | Cog 2R         |                                    | TCGACGCCATCTTCATTACACA                                   |            |
| MS phage         | MS2.F          | 289–387                            | TGGCACTACCCCTCTCCGTATTACAG                               | 19         |
|                  | MS2.R          |                                    | GTACGGGCGACCCACGATGAC                                    |            |
| Astrovirus       | AsFF           | ORF1b                              | GGC CAG ACT CAC AGA AGA GCA                              | 20         |
|                  | AsFr           |                                    | GTC CTG TGA CAC CTT GTT TCC TGA                          |            |
| Sapovirus        | SaV124F        | ORF1                               | GAY CAS GCT CTC GCY ACC TAC                              | 42         |
|                  | SaV1F          |                                    | TTG GCC CTC GCC ACC TAC                                  |            |
|                  | SaV5F          |                                    | TTT GAA CAA GCT GTG GCA TGC TAC                          | 42         |
|                  | SaV1245R       |                                    | CCC TCC ATY TCA AAC ACT A                                |            |
| Adenovirus       | JTVFF          | Hexon                              | AAC TTT CTC TCT TAA TAG ACG CC                           | 44         |
|                  | JTVFR          |                                    | AGG GGG CTA GAA AAC AAA A                                |            |
| Organisms        | Probes         | Target                             | Probe Sequences (5'-3')                                  | References |
| Campylobacter    | cadFP          | cadF                               | [HEX]-CATTTTGACGATTTTGGCTTGA-[BHQ2]                      | 16         |
| Norovirus<br>GI  | Ring 1E        | ORF1–<br>ORF2<br>junction<br>(GI)  | [6-FAM]-AGATYGCGRTCYCCTGTCCA-[Tamra]                     | 41         |
| Norovirus<br>GII | Ring 2         | ORF1–<br>ORF2<br>junction<br>(GII) | [CY5]-TGGGAGGGCGATCGCAATCT-[BHQ2]                        | 41         |
| MS phage         | MS2.P<br>probe | neucleoti<br>de 289–<br>387        | [5-HEX]-<br>CACATCGATAGATCAAGGTGCCTACAAGC-<br>[BHQ1]     | 19         |
| Astrovirus       | AstZFb         | ORF1b                              | [5-HEX]-CCA TCG CAT TTG GAG GGG AGG ACC<br>AGC GA-[BHQ1] | 20         |
| Sapovirus        | SaV124TP       | ORF1                               | [6-FAM]-CCR CCT ATR AAC CA-[MGB-NQF]                     | 42         |
|                  | SaV5TP         | ORF1                               | [6-FAM]-TGC CAC CAA TGT ACC A-[MGB-NQF]                  | 42         |
| Adenovirus       | JTVFAP         | Hexon                              | [6-FAM]-CGA AGA GTG CCC GTG TCA GC-[BHQ1]                | 44         |

DAEC = Diffusely adherent *E. coli*; EAEC = Enteroaggregative *E. coli*; EIEC = Enteroinvasive *E. coli*; EPEC = Enteropathogenic *E. coli*; ETEC = Enterotoxigenic *E. coli*; and STEC = Shiga toxin-producing *E. coli*

**STable 2.** Reaction Mix for norovirus, astrovirus, sapovirus and Campylobacter PCR

| Reaction Mix for GI/GII Norovirus Multiplex RT-qPCR Assay |                          |                     |
|-----------------------------------------------------------|--------------------------|---------------------|
| Component                                                 | Volume per reaction (µl) | Final concentration |
| 2X RT-PCR buffer*                                         | 12.5                     | 1X                  |
| Nuclease-free water*                                      | 1.08                     | n/a                 |
| Detection Enhancer*                                       | 1.67                     | n/a                 |
| Cog1F (10 µM)                                             | 1                        | 400 nM              |
| Cog1R (10 µM)                                             | 1                        | 400 nM              |
| Ring 1E (10 µM)                                           | 0.5                      | 200 nM              |
| Cog2F (10 µM)                                             | 1                        | 400 nM              |
| Cog2R (10 µM)                                             | 1                        | 400 nM              |
| Ring 2 (10 µM)                                            | 0.5                      | 200 nM              |
| MS2.F (10 µM)                                             | 0.25                     | 100 nM              |
| MS2.R (10 µM)                                             | 0.25                     | 100 nM              |
| MS2.P (10 µM)                                             | 0.25                     | 100 nM              |
| 25X RT-PCR enzyme*                                        | 1                        | 1x                  |
| RNA sample                                                | 3                        |                     |

  

| Reaction Mix Astrovirus/Sapovirus Duplex RT-qPCR Assay |                          |                     |
|--------------------------------------------------------|--------------------------|---------------------|
| Component                                              | Volume per reaction (µl) | Final concentration |
| 2X RT-PCR buffer*                                      | 12.5                     | 1X                  |
| Nuclease-free water*                                   | 2.5                      | n/a                 |
| AsFF (10 µM)                                           | 0.6                      | 250 nM              |
| AsFR (10 µM)                                           | 0.6                      | 250 nM              |
| AstZFB (10 µM)                                         | 0.25                     | 100 nM              |
| SaV 124F (10 µM)                                       | 1                        | 400 nM              |
| SaV 1F (10 µM)                                         | 1                        | 400 nM              |
| SaV 5F (10 µM)                                         | 1                        | 400 nM              |
| SaV 1245R (10 µM)                                      | 1                        | 400 nM              |
| SaV124TP (10 µM)                                       | 0.25                     | 100 nM              |
| SaV 5TP (10 µM)                                        | 0.25                     | 100 nM              |
| 25X RT-PCR enzyme*                                     | 1                        | 1x                  |
| RNA sample                                             | 3                        |                     |

  

| Reaction Mix for adenovirus RT-qPCR Assay |                          |                     |
|-------------------------------------------|--------------------------|---------------------|
| Component                                 | Volume per reaction (µl) | Final concentration |
| 2X RT-PCR buffer*                         | 12.5                     | 1X                  |
| Nuclease-free water*                      | 4.33                     | n/a                 |
| Detection Enhancer*                       | 1.67                     | n/a                 |
| Cog1F (10 µM)                             | 1                        | 400 nM              |
| Cog1R (10 µM)                             | 1                        | 400 nM              |
| Ring 1E (10 µM)                           | 0.5                      | 200 nM              |
| 25X RT-PCR enzyme*                        | 1                        | 1x                  |
| RNA sample                                | 3                        |                     |

### Reaction Mix for Campylobacter qPCR Assay

| Component                                 | Volume per reaction (μl) | Final concentration |
|-------------------------------------------|--------------------------|---------------------|
| TaqMan<br>Environmental Master<br>Mix 2.0 | 12.5                     | 1X                  |
| Nuclease-free water                       | 9                        | n/a                 |
| cadF-F (10 μM)                            | 1                        | 400 nM              |
| cadF-R (10 μM)                            | 1                        | 400 nM              |
| cadF-P (10 μM)                            | 0.5                      | 200 nM              |
| DNA sample                                | 1                        |                     |

\* included in the Ag-Path Kit

**STable 3.** Socio-economic risk factors associated with acute diarrheal disease in cases and healthy controls

| Risk factors                   | Cases |      | Controls |      | <i>P</i> |
|--------------------------------|-------|------|----------|------|----------|
|                                | No.   | %    | No.      | %    |          |
| <b>Annual income*</b>          |       |      |          |      |          |
| Unknown                        | 6     | 13.3 | 7        | 15.6 | 0.74     |
| ≤1                             | 25    | 55.6 | 26       | 57.8 | 0.83     |
| 1-2                            | 10    | 22.2 | 10       | 22.2 | 0.92     |
| 2-6                            | 4     | 8.9  | 2        | 4.4  | 0.58     |
| <b>Housing Levels</b>          |       |      |          |      |          |
| Unknown                        | 1     | 2.2  | 4        | 8.9  | 0.36     |
| 1                              | 13    | 28.9 | 19       | 42.2 | 0.17     |
| 2                              | 12    | 26.7 | 13       | 28.9 | 0.94     |
| 3                              | 15    | 33.3 | 8        | 17.8 | 0.14     |
| 4                              | 4     | 8.9  | 1        | 2.2  | 0.36     |
| 5                              | 0     | 0    | 0        | 0.0  | N.A.     |
| <b>Health System Insurance</b> |       |      |          |      |          |
| Contributive                   | 31    | 68.9 | 22       | 48.9 | 0.086    |
| Subsidized                     | 9     | 20.0 | 21       | 46.7 | 0.02     |
| Private                        | 3     | 6.7  | 0        | 0.0  | 0.24     |
| Non-insured                    | 1     | 2.2  | 2        | 4.4  | 1        |
| Unknown                        | 1     | 2.2  | 0        | 0.0  | 1        |
| <b>Education of caregivers</b> |       |      |          |      |          |
| Unknown                        | 1     | 2.2  | 0        | 0.0  | 0.4944   |
| None                           | 0     | 0.0  | 2        | 4.4  |          |
| Elementary                     | 9     | 20.0 | 10       | 22.2 |          |
| Secondary                      | 18    | 40.0 | 19       | 42.2 |          |
| Technological school           | 11    | 24.4 | 10       | 22.2 | 0.76     |
| University                     | 6     | 13.3 | 4        | 8.9  | 0.74     |

\*: Income level 1 = One or less than one minimum salary per household per month (Colombian pesos \$589,500)

N.A.=not applicable

**STable 4.** Epidemiological risk factors associated with acute diarrheal disease in cases and healthy controls

| Risk factors              | Cases |       | Controls |       | <i>P</i> |
|---------------------------|-------|-------|----------|-------|----------|
|                           | No.   | %     | No.      | %     |          |
| Animals exposure          | 23    | 51.1  | 25       | 55.6  | 0.83     |
| AGE Contacts outside home | 2     | 4.4   | 2        | 4.4   | 1        |
| Water sources             | 45    | 100.0 | 45       | 100.0 | 1        |
| Garbage collection        | 45    | 100.0 | 45       | 100.0 | 1        |
| Sewerage                  | 44    | 97.8  | 45       | 100.0 | 1        |
